# Supplementary material
Source: publisher figshare collection journal article supplement (https://tandf.figshare.com/articles/dataset/_/6809906)
Supplement: Supplementary file 1 [file 1]

**Supplementary table S2:** Secondary ES indicators' scoring per site and Total ES score.

| NATURA<br>2000 SITE<br>CODE | SITE<br>TYPE | SITE NAME                                                                                        | Forest area | Grazing land | Cultivated<br>area | Settlement<br>area | Ski centers | Lakes | Wildlife<br>refuges | Controlled<br>hunting areas | Game breeding<br>stations | Eco-development<br>areas | Livestock | Traditional<br>settlements | Sites of special<br>nature beauty | Flora species<br>(92/43 EEC) | Fauna<br>species<br>(92/43 EEC) | National<br>park | Priority<br>habitats<br>(92/43 EEC) | Habitats<br>(92/43 EEC) | Archaeological<br>sites | TOTAL ES<br>SCORE |
|-----------------------------|--------------|--------------------------------------------------------------------------------------------------|-------------|--------------|--------------------|--------------------|-------------|-------|---------------------|-----------------------------|---------------------------|--------------------------|-----------|----------------------------|-----------------------------------|------------------------------|---------------------------------|------------------|-------------------------------------|-------------------------|-------------------------|-------------------|
| GR1260001                   | SCI          | LIMNI KERKINI -<br>KROUSIA -<br>KORYFES OROUS<br>BELES, ANGISTRO -<br>CHARORO                    | 3           | 2            | 3                  | 3                  | 0           | 3     | 3                   | 0                           | 0                         | 0                        | 2         | 0                          | 1                                 | 1                            | 3                               | 3                | 1                                   | 3                       | 1                       | 32                |
| GR1340001                   | SPASCI       | ETHINOS DRYMOS<br>PRESPON                                                                        | 2           | 1            | 1                  | 1                  | 0           | 3     | 3                   | 0                           | 0                         | 0                        | 2         | 1                          | 1                                 | 0                            | 3                               | 3                | 3                                   | 3                       | 2                       | 29                |
| GR4340008                   | SCI          | LEFKA ORI KAI<br>PARAKTIA ZONI                                                                   | 3           | 3            | 0                  | 0                  | 0           | 0     | 1                   | 0                           | 0                         | 0                        | 2         | 3                          | 3                                 | 3                            | 1                               | 3                | 1                                   | 3                       | 3                       | 29                |
| GR1430001                   | SCI          | OROS PILIO KAI<br>PARAKTIA<br>THALASSIA ZONI                                                     | 3           | 2            | 2                  | 3                  | 3           | 0     | 2                   | 0                           | 0                         | 0                        | 1         | 3                          | 2                                 | 0                            | 1                               | 3                | 0                                   | 2                       | 1                       | 28                |
| GR2520006                   | SCI          | OROS PARNONAS<br>(KAI PERIOCHI<br>MALEVIS)                                                       | 3           | 3            | 2                  | 2                  | 0           | 0     | 2                   | 0                           | 0                         | 0                        | 2         | 2                          | 1                                 | 1                            | 1                               | 3                | 2                                   | 2                       | 2                       | 28                |
| GR4320002                   | SCI          | DIKTI: OROPEDIO<br>LASITHIOU,<br>KATHARO,<br>SELENA, KRASI,<br>SELAKANO,<br>CHALASMENI<br>KORYFI | 3           | 3            | 3                  | 0                  | 0           | 0     | 3                   | 0                           | 0                         | 0                        | 2         | 0                          | 3                                 | 2                            | 1                               | 0                | 1                                   | 2                       | 3                       | 26                |
| GR1250001                   | SPASCI       | OROS OLYMPOS                                                                                     | 2           | 2            | 1                  | 1                  | 3           | 0     | 2                   | 0                           | 0                         | 0                        | 1         | 1                          | 1                                 | 0                            | 1                               | 3                | 3                                   | 3                       | 1                       | 25                |
| GR2450005                   | SCI          | NOTIOANATOLIKO<br>S PARNASSOS -<br>ETHNIKOS<br>DRYMOS<br>PARNASSOU -<br>DASOS TITHOREAS          | 2           | 2            | 1                  | 1                  | 3           | 0     | 1                   | 0                           | 0                         | 0                        | 2         | 0                          | 1                                 | 1                            | 2                               | 3                | 1                                   | 1                       | 3                       | 24                |
| GR2530001                   | SCI          | KORYFES OROUS<br>KYLINI (ZIRIA)<br>KAI CHARADRA<br>FLAMPOURITSA                                  | 2           | 2            | 2                  | 5                  | 3           | 0     | 1                   | 0                           | 0                         | 0                        | 1         | 0                          | 1                                 | 1                            | 1                               | 0                | 2                                   | 2                       | 1                       | 24                |
| GR2550006                   | SCI          | OROS TAYGETOS                                                                                    | 3           | 3            | 2                  | 2                  | 0           | 0     | 2                   | 0                           | 0                         | 0                        | 2         | 0                          | 2                                 | 2                            | 1                               | 0                | 1                                   | 2                       | 2                       | 24                |
| GR1210001                   | SCI          | OROS VERMIO                                                                                      | 2           | 1            | 1                  | 2                  | 3           | 0     | 2                   | 0                           | 3                         | 0                        | 1         | 0                          | 1                                 | 0                            | 1                               | 3                | 1                                   | 2                       | 0                       | 23                |
| GR1320002                   | SPASCI       | KORYFES OROUS<br>GRAMMOS                                                                         | 3           | 2            | 1                  | 1                  | 0           | 0     | 3                   | 0                           | 0                         | 0                        | 2         | 0                          | 1                                 | 1                            | 1                               | 3                | 2                                   | 2                       | 1                       | 23                |
| GR2130001                   | SCI          | ETHNIKOS<br>DRYMOS VIKOU -<br>AOOU                                                               | 1           | 2            | 1                  | 1                  | 0           | 0     | 2                   | 0                           | 0                         | 0                        | 1         | 3                          | 2                                 | 0                            | 1                               | 3                | 2                                   | 2                       | 2                       | 23                |
| GR4330005                   | SCI          | OROS IDI<br>(VORIZIA,<br>GERANOI, KALI<br>MADARA)                                                | 3           | 3            | 1                  | 0                  | 0           | 0     | 3                   | 0                           | 0                         | 0                        | 2         | 0                          | 2                                 | 2                            | 1                               | 0                | 1                                   | 2                       | 3                       | 23                |
| GR1110005                   | SCI          | VOUNA EVROU                                                                                      | 3           | 1            | 3                  | 2                  | 0           | 0     | 2                   | 0                           | 0                         | 0                        | 2         | 0                          | 0                                 | 1                            | 1                               | 3                | 2                                   | 2                       | 0                       | 22                |
| GR1440002                   | SCI          | KERKETIO OROS<br>(KOZIAKAS)                                                                      | 3           | 2            | 2                  | 3                  | 3           | 0     | 0                   | 2                           | 0                         | 0                        | 1         | 0                          | 1                                 | 0                            | 1                               | 0                | 1                                   | 2                       | 1                       | 22                |
| GR1440003                   | SCI          | ANTICHASIA ORI -<br>METEORA                                                                      | 3           | 2            | 3                  | 0                  | 0           | 0     | 3                   | 0                           | 0                         | 0                        | 1         | 0                          | 1                                 | 3                            | 1                               | 0                | 1                                   | 1                       | 3                       | 22                |
| GR2130004                   | SCI          | KENTRIKO TMIMA<br>ZAGORIOU                                                                       | 3           | 1            | 1                  | 2                  | 0           | 0     | 0                   | 0                           | 0                         | 0                        | 2         | 3                          | 1                                 | 0                            | 1                               | 3                | 1                                   | 2                       | 2                       | 22                |
| GR2320002                   | SCI          | OROS CHELMOS<br>KAI YDATA<br>STYGOS                                                              | 2           | 2            | 1                  | 2                  | 3           | 0     | 1                   | 0                           | 0                         | 0                        | 1         | 0                          | 1                                 | 1                            | 1                               | 3                | 1                                   | 2                       | 1                       | 22                |

|           |        |                                                                                                        |   |   |   |   |   |   |   |   |   |   |   |   |   |   |   |   |   |   |   |    |
|-----------|--------|--------------------------------------------------------------------------------------------------------|---|---|---|---|---|---|---|---|---|---|---|---|---|---|---|---|---|---|---|----|
| GR2540001 | SCI    | ORI GIDOVOUNI, CHIONOVOUNI, GAIDOUROVOUNI, KORAKIA, KALOGEROVOUNI, KOULOCHERA KAI PERIOCHI MONEMVASIAS | 3 | 2 | 2 | 2 | 0 | 0 | 1 | 0 | 0 | 0 | 2 | 1 | 1 | 0 | 1 | 3 | 0 | 2 | 2 | 22 |
| GR4130001 | SCI    | VOREIA CHIOS KAI NISOI OINOUSSES KAI PARAKTIA THALASSIA ZONI                                           | 1 | 2 | 2 | 2 | 0 | 0 | 3 | 0 | 0 | 0 | 2 | 3 | 2 | 0 | 1 | 0 | 0 | 1 | 2 | 21 |
| GR1240001 | SCI    | KORYFES OROUS VORA                                                                                     | 3 | 2 | 1 | 1 | 0 | 1 | 2 | 0 | 0 | 0 | 1 | 0 | 2 | 0 | 1 | 0 | 2 | 3 | 1 | 20 |
| GR2130002 | SPASCI | KORYFES OROUS SMOLIKAS                                                                                 | 2 | 2 | 1 | 1 | 0 | 0 | 1 | 0 | 0 | 0 | 2 | 0 | 1 | 1 | 1 | 3 | 2 | 2 | 0 | 19 |
| GR4110003 | SCI    | LESVOS: DYTIKI CHERSONISOS - APOLITHOMENO DASOS                                                        | 2 | 2 | 2 | 1 | 0 | 0 | 3 | 0 | 0 | 0 | 1 | 0 | 0 | 0 | 1 | 0 | 2 | 2 | 3 | 19 |
| GR2520001 | SCI    | OROS MAINALO                                                                                           | 2 | 2 | 2 | 2 | 3 | 0 | 1 | 0 | 0 | 0 | 1 | 2 | 0 | 0 | 1 | 0 | 0 | 1 | 1 | 18 |
| GR4210005 | SCI    | RODOS: AKRAMYTIS, ARMENISTIS, ATTAVYROS, REMATA KAI THALASSIA ZONI (KARAVOLA-ORMOS GLYFADA)            | 2 | 2 | 2 | 2 | 0 | 0 | 1 | 0 | 0 | 0 | 1 | 2 | 1 | 1 | 1 | 0 | 1 | 2 | 0 | 18 |
| GR1420003 | SCI    | AISTHITIKO DASOS OSSAS                                                                                 | 2 | 2 | 1 | 1 | 0 | 0 | 0 | 2 | 0 | 0 | 2 | 1 | 1 | 0 | 1 | 0 | 1 | 2 | 1 | 17 |
| GR2110002 | SCI    | ORI ATHAMANON (NERAIDA)                                                                                | 2 | 2 | 1 | 2 | 0 | 0 | 2 | 0 | 0 | 0 | 2 | 0 | 0 | 1 | 1 | 0 | 2 | 2 | 0 | 17 |
| GR2130006 | SCI    | PERIOCHI METSOVOU (ANIILIO - KATARA)                                                                   | 1 | 1 | 1 | 2 | 3 | 0 | 0 | 0 | 0 | 0 | 2 | 1 | 1 | 0 | 1 | 0 | 1 | 2 | 1 | 17 |
| GR2310010 | SCI    | OROS ARAKYNTHOS KAI STENA KLEISOURAS                                                                   | 2 | 2 | 1 | 1 | 0 | 0 | 2 | 0 | 0 | 0 | 1 | 0 | 1 | 1 | 1 | 3 | 0 | 1 | 1 | 17 |
| GR2320008 | SCI    | OROS ERYMANTHOS                                                                                        | 2 | 3 | 1 | 2 | 0 | 0 | 1 | 0 | 0 | 0 | 2 | 0 | 0 | 0 | 1 | 0 | 2 | 2 | 1 | 17 |
| GR2420001 | SCI    | OROS OCHI - KAMPOS KARYSTOU - POTAMI - AKROTIRIO KAFIREFS - PARAKTIA THALASSIA ZONI                    | 2 | 2 | 1 | 2 | 0 | 0 | 0 | 0 | 0 | 0 | 2 | 0 | 2 | 0 | 1 | 0 | 0 | 2 | 3 | 17 |
| GR2440004 | SCI    | ETHNIKOS DRYMOS OITIS                                                                                  | 1 | 1 | 1 | 1 | 0 | 0 | 1 | 0 | 0 | 0 | 1 | 0 | 1 | 1 | 1 | 3 | 3 | 2 | 0 | 17 |
| GR2520005 | SCI    | MONI ELONAS KAI CHARADRA LEONIDIOU                                                                     | 1 | 1 | 2 | 2 | 0 | 0 | 0 | 0 | 0 | 0 | 2 | 1 | 0 | 1 | 1 | 3 | 1 | 1 | 1 | 17 |
| GR4110005 | SCI    | LESVOS: KOLPOS GERAS, ELOS NTIPI KAI OROS OLYMPOS                                                      | 1 | 1 | 2 | 1 | 0 | 0 | 2 | 0 | 0 | 0 | 1 | 1 | 1 | 0 | 1 | 0 | 1 | 2 | 3 | 17 |
| GR4330003 | SCI    | KOURTALIOTIKO FARANGI - MONI PREVELI - EVRYTERI PERIOCHI                                               | 1 | 1 | 2 | 1 | 0 | 0 | 2 | 0 | 0 | 0 | 1 | 0 | 1 | 1 | 1 | 0 | 2 | 2 | 2 | 17 |
| GR1250002 | SCI    | PIERIA ORI                                                                                             | 2 | 2 | 1 | 1 | 0 | 0 | 2 | 0 | 0 | 0 | 1 | 1 | 1 | 0 | 1 | 0 | 2 | 2 | 0 | 16 |

|           |        |                                                                                                                              |   |   |   |   |   |   |   |   |   |   |   |   |   |   |   |   |   |   |   |    |
|-----------|--------|------------------------------------------------------------------------------------------------------------------------------|---|---|---|---|---|---|---|---|---|---|---|---|---|---|---|---|---|---|---|----|
| GR1270001 | SCI    | OROS<br>CHOLOMONTAS                                                                                                          | 2 | 1 | 2 | 2 | 0 | 0 | 2 | 0 | 0 | 0 | 2 | 0 | 0 | 0 | 1 | 3 | 0 | 1 | 0 | 16 |
| GR1310001 | SCI    | VASILITSA                                                                                                                    | 1 | 1 | 0 | 1 | 3 | 0 | 1 | 0 | 0 | 0 | 1 | 0 | 0 | 0 | 1 | 3 | 2 | 2 | 0 | 16 |
| GR1440001 | SCI    | ASPROPOTAMOS                                                                                                                 | 2 | 1 | 1 | 2 | 0 | 0 | 2 | 0 | 0 | 0 | 1 | 2 | 0 | 0 | 1 | 0 | 1 | 2 | 1 | 16 |
| GR2440006 | SCI    | OROS<br>KALLIDROMO                                                                                                           | 2 | 1 | 1 | 1 | 0 | 0 | 2 | 0 | 0 | 0 | 2 | 0 | 1 | 0 | 1 | 0 | 1 | 2 | 2 | 16 |
| GR3000001 | SPASCI | OROS PARNITHA                                                                                                                | 2 | 1 | 1 | 1 | 0 | 0 | 1 | 0 | 3 | 0 | 0 | 0 | 1 | 0 | 1 | 3 | 0 | 1 | 1 | 16 |
| GR1340003 | SPASCI | ORI VARNOUNTA                                                                                                                | 1 | 3 | 1 | 1 | 0 | 0 | 0 | 0 | 0 | 0 | 2 | 0 | 0 | 0 | 1 | 3 | 1 | 2 | 0 | 15 |
| GR1150005 | SCI    | KORYFES OROUS<br>PANGAIO                                                                                                     | 1 | 1 | 1 | 1 | 0 | 0 | 2 | 0 | 0 | 0 | 1 | 2 | 1 | 0 | 1 | 0 | 0 | 2 | 2 | 15 |
| GR1260007 | SCI    | ORI VRONTOUS -<br>LAILIAS - EPIMIKES                                                                                         | 1 | 3 | 1 | 1 | 3 | 0 | 0 | 2 | 0 | 0 | 0 | 0 | 1 | 0 | 1 | 0 | 1 | 1 | 0 | 15 |
| GR2130008 | SCI    | OROS MITSIKELI                                                                                                               | 1 | 2 | 1 | 0 | 0 | 0 | 1 | 0 | 0 | 3 | 2 | 0 | 0 | 0 | 1 | 3 | 0 | 1 | 0 | 15 |
| GR4210006 | SCI    | RODOS: PROFITIS<br>ILIAS - EPTA PIGES -<br>PETALOUEDES -<br>REMATA                                                           | 1 | 1 | 2 | 2 | 0 | 0 | 1 | 0 | 0 | 0 | 2 | 1 | 1 | 1 | 1 | 0 | 0 | 2 | 0 | 15 |
| GR4310002 | SCI    | GIOUCHTAS -<br>FARANGI AGIAS<br>EIRINIS                                                                                      | 1 | 1 | 1 | 0 | 0 | 0 | 0 | 0 | 0 | 0 | 2 | 0 | 2 | 1 | 1 | 0 | 1 | 2 | 3 | 15 |
| GR4320005 | SCI    | OROS THRYPTIS<br>KAI GYRO<br>PERIOCHI                                                                                        | 1 | 1 | 2 | 2 | 0 | 0 | 1 | 0 | 0 | 0 | 2 | 0 | 1 | 1 | 1 | 0 | 1 | 1 | 1 | 15 |
| GR1240003 | SCI    | OROS PAIKO                                                                                                                   | 3 | 1 | 2 | 2 | 0 | 0 | 2 | 0 | 0 | 0 | 1 | 1 | 0 | 0 | 1 | 0 | 0 | 1 | 0 | 14 |
| GR1270005 | SCI    | OROS<br>STRATONIKON -<br>KORYFI SKAMNI                                                                                       | 1 | 1 | 1 | 2 | 0 | 0 | 2 | 0 | 0 | 0 | 1 | 0 | 1 | 0 | 1 | 0 | 1 | 2 | 1 | 14 |
| GR1420001 | SCI    | KATO OLYMPOS -<br>KALLIPEFKI                                                                                                 | 1 | 2 | 2 | 1 | 0 | 0 | 2 | 0 | 0 | 0 | 1 | 0 | 1 | 0 | 1 | 0 | 1 | 2 | 0 | 14 |
| GR1270002 | SCI    | OROS ITAMOS -<br>SITHONIA                                                                                                    | 2 | 1 | 1 | 2 | 0 | 0 | 1 | 0 | 0 | 0 | 1 | 0 | 1 | 0 | 1 | 0 | 1 | 1 | 1 | 13 |
| GR2310005 | SCI    | OROS VARASOVA                                                                                                                | 1 | 1 | 1 | 1 | 0 | 0 | 0 | 0 | 0 | 0 | 2 | 0 | 1 | 1 | 1 | 3 | 0 | 1 | 0 | 13 |
| GR2320007 | SCI    | OROS<br>PANACHAIKO                                                                                                           | 1 | 2 | 1 | 3 | 0 | 0 | 1 | 0 | 0 | 0 | 2 | 0 | 0 | 0 | 1 | 0 | 1 | 1 | 0 | 13 |
| GR2430001 | SCI    | OROS TYMFRISTOS<br>(VELOUCHI)                                                                                                | 1 | 1 | 1 | 0 | 3 | 0 | 2 | 0 | 0 | 0 | 1 | 0 | 0 | 1 | 1 | 0 | 1 | 1 | 0 | 13 |
| GR2450001 | SCI    | ORI VARDOUSIA                                                                                                                | 2 | 2 | 1 | 2 | 0 | 0 | 1 | 0 | 0 | 0 | 2 | 0 | 0 | 0 | 1 | 0 | 1 | 1 | 0 | 13 |
| GR2450002 | SCI    | OROS GKIONA                                                                                                                  | 2 | 1 | 1 | 1 | 0 | 0 | 2 | 0 | 0 | 0 | 2 | 0 | 0 | 0 | 1 | 0 | 1 | 2 | 0 | 13 |
| GR4120003 | SCI    | SAMOS: OROS<br>KERKETEFs -<br>MIKRO KAI<br>MEGALO SEITANI -<br>DASOS KASTANIAS<br>KAI LEKKAS, AKR.<br>KATAVASIS -<br>LIMENAS | 1 | 1 | 1 | 1 | 0 | 0 | 0 | 0 | 0 | 0 | 1 | 0 | 2 | 1 | 1 | 0 | 0 | 2 | 2 | 13 |
| GR4310006 | SCI    | DIKTI: OMALOS<br>VIANNOU (SYMI -<br>OMALOS)                                                                                  | 1 | 1 | 1 | 1 | 0 | 0 | 1 | 0 | 0 | 0 | 2 | 0 | 0 | 1 | 1 | 0 | 1 | 2 | 1 | 13 |
| GR1260004 | SCI    | KORYFES OROUS<br>MENOIKION -<br>OROS<br>KOUSKOURAS -<br>YPSOMA                                                               | 2 | 2 | 1 | 1 | 0 | 0 | 1 | 0 | 0 | 0 | 2 | 0 | 0 | 0 | 1 | 0 | 0 | 1 | 1 | 12 |
| GR2320004 | SCI    | AISTHITIKO DASOS<br>KALAVRYTON                                                                                               | 1 | 1 | 1 | 1 | 0 | 0 | 0 | 0 | 0 | 0 | 1 | 0 | 1 | 0 | 2 | 3 | 0 | 1 | 0 | 12 |
| GR1120003 | SCI    | OROS CHAINTOU -<br>KOULA KAI GYRO<br>KORYFES                                                                                 | 1 | 1 | 1 | 0 | 0 | 0 | 0 | 0 | 0 | 0 | 1 | 0 | 1 | 0 | 1 | 3 | 0 | 1 | 1 | 11 |

|           |        |                                                                                                   |   |   |   |   |   |   |   |   |   |   |   |   |   |   |   |   |   |   |   |    |
|-----------|--------|---------------------------------------------------------------------------------------------------|---|---|---|---|---|---|---|---|---|---|---|---|---|---|---|---|---|---|---|----|
| GR1140003 | SCI    | PERIOCHI ELATIA,<br>PYRAMIS KOUTRA                                                                | 1 | 1 | 0 | 0 | 0 | 0 | 1 | 0 | 0 | 0 | 0 | 0 | 0 | 1 | 1 | 3 | 1 | 2 | 0 | 11 |
| GR1140004 | SCI    | KORYFES OROUS<br>FALAKRO                                                                          | 1 | 2 | 0 | 0 | 3 | 0 | 0 | 0 | 0 | 0 | 1 | 0 | 1 | 0 | 1 | 0 | 1 | 1 | 0 | 11 |
| GR1240002 | SCI    | ORI TZENA                                                                                         | 2 | 1 | 1 | 1 | 0 | 0 | 1 | 0 | 0 | 0 | 2 | 0 | 0 | 0 | 1 | 0 | 0 | 2 | 0 | 11 |
| GR1250003 | SCI    | OROS TITAROS                                                                                      | 1 | 1 | 1 | 1 | 0 | 0 | 2 | 0 | 0 | 0 | 1 | 0 | 1 | 0 | 1 | 0 | 1 | 1 | 0 | 11 |
| GR2220001 | SCI    | KALON OROS<br>KEFALONIAS                                                                          | 1 | 1 | 1 | 1 | 0 | 0 | 0 | 0 | 0 | 0 | 2 | 1 | 1 | 0 | 1 | 0 | 0 | 1 | 1 | 11 |
| GR2310004 | SCI    | OROS<br>PANAITOLIKO                                                                               | 2 | 1 | 1 | 1 | 0 | 0 | 2 | 0 | 0 | 0 | 1 | 0 | 0 | 0 | 1 | 0 | 1 | 1 | 0 | 11 |
| GR2440003 | SCI    | FARANGI<br>GORGOPOTAMOU                                                                           | 1 | 1 | 1 | 0 | 0 | 0 | 1 | 0 | 0 | 0 | 1 | 0 | 1 | 0 | 1 | 3 | 0 | 1 | 0 | 11 |
| GR3000006 | SCI    | YMITTOS -<br>AISTHITIKO DASOS<br>KAISARIANIS -<br>LIMNI<br>VOULIAGMENIS                           | 1 | 2 | 1 | 3 | 0 | 0 | 0 | 0 | 0 | 0 | 0 | 0 | 1 | 0 | 1 | 0 | 0 | 1 | 1 | 11 |
| GR1110003 | SCI    | TREIS VRYSES                                                                                      | 1 | 1 | 0 | 0 | 0 | 0 | 1 | 0 | 0 | 0 | 2 | 0 | 0 | 0 | 1 | 3 | 0 | 1 | 0 | 10 |
| GR1110004 | SCI    | FENGARI<br>SAMOTHRAKIS,<br>ANATOLIKES<br>AKTES,<br>VRACHONISSIDA<br>ZOURAFA KAI<br>THALASSIA ZONI | 1 | 2 | 1 | 0 | 0 | 0 | 0 | 0 | 0 | 0 | 1 | 0 | 1 | 0 | 1 | 0 | 1 | 2 | 0 | 10 |
| GR1260005 | SCI    | KORYFES OROUS<br>ORVILOS                                                                          | 1 | 1 | 1 | 1 | 0 | 0 | 0 | 0 | 0 | 0 | 2 | 0 | 0 | 1 | 1 | 0 | 1 | 1 | 0 | 10 |
| GR1310003 | SCI    | ETHNIKOS<br>DRYMOS PINDOU<br>(VALIA KALNTA) -<br>EVRIITERI<br>PERIOCHI                            | 1 | 1 | 0 | 0 | 0 | 0 | 2 | 0 | 0 | 0 | 2 | 0 | 1 | 0 | 1 | 0 | 1 | 1 | 0 | 10 |
| GR1340006 | SCI    | OROS VERNON -<br>KORYFI VITSI                                                                     | 1 | 1 | 1 | 2 | 0 | 0 | 0 | 0 | 0 | 0 | 1 | 0 | 1 | 0 | 1 | 0 | 1 | 1 | 0 | 10 |
| GR2220002 | SCI    | ETHNIKOS<br>DRYMOS AINOY                                                                          | 1 | 1 | 0 | 0 | 0 | 0 | 0 | 0 | 0 | 0 | 1 | 0 | 1 | 0 | 1 | 3 | 0 | 1 | 1 | 10 |
| GR2320005 | SCI    | ORI BARMPAS KAI<br>KLOKOS, FARANGI<br>SELINOYNTA                                                  | 1 | 1 | 1 | 1 | 0 | 0 | 0 | 0 | 0 | 0 | 2 | 0 | 2 | 0 | 1 | 0 | 0 | 1 | 0 | 10 |
| GR2320009 | SCI    | SPILAIY KASTRION                                                                                  | 1 | 1 | 1 | 0 | 0 | 0 | 0 | 0 | 0 | 0 | 2 | 0 | 0 | 0 | 1 | 3 | 0 | 1 | 0 | 10 |
| GR2530004 | SCI    | OROS OLIGYRTOS                                                                                    | 1 | 2 | 1 | 1 | 0 | 0 | 1 | 0 | 0 | 0 | 1 | 0 | 0 | 0 | 1 | 0 | 1 | 1 | 0 | 10 |
| GR2530005 | SCI    | ORI GERANEIA                                                                                      | 1 | 1 | 0 | 0 | 0 | 0 | 2 | 0 | 0 | 0 | 1 | 0 | 1 | 1 | 1 | 0 | 1 | 1 | 0 | 10 |
| GR4120002 | SCI    | SAMOS: OROS<br>AMPELOS<br>(KARVOYNTIS)                                                            | 1 | 1 | 1 | 0 | 0 | 0 | 1 | 0 | 0 | 0 | 1 | 0 | 1 | 0 | 1 | 0 | 1 | 1 | 1 | 10 |
| GR4330002 | SCI    | OROS KEDROS                                                                                       | 1 | 1 | 1 | 1 | 0 | 0 | 0 | 0 | 0 | 0 | 2 | 0 | 0 | 0 | 1 | 0 | 1 | 2 | 0 | 10 |
| GR1140002 | SCI    | RODOPI (SIMYDA)                                                                                   | 1 | 1 | 0 | 0 | 0 | 0 | 0 | 0 | 0 | 0 | 0 | 0 | 1 | 0 | 1 | 3 | 1 | 1 | 0 | 9  |
| GR1410002 | SCI    | AGRAFA                                                                                            | 1 | 1 | 1 | 1 | 0 | 0 | 1 | 0 | 0 | 0 | 2 | 0 | 0 | 0 | 1 | 0 | 0 | 1 | 0 | 9  |
| GR2330002 | SPASCI | OROPEDIO FOLOYIS                                                                                  | 1 | 1 | 2 | 1 | 0 | 0 | 0 | 0 | 0 | 0 | 2 | 0 | 0 | 0 | 1 | 0 | 0 | 1 | 0 | 9  |
| GR2420002 | SCI    | DIRFYS: DASOS<br>STENIS - DELFI                                                                   | 1 | 1 | 0 | 0 | 0 | 0 | 1 | 0 | 0 | 0 | 2 | 0 | 0 | 1 | 1 | 0 | 0 | 2 | 0 | 9  |
| GR2540005 | SCI    | LAGKADA TRYPIIS                                                                                   | 1 | 0 | 1 | 1 | 0 | 0 | 0 | 0 | 0 | 0 | 1 | 0 | 1 | 1 | 1 | 0 | 1 | 1 | 0 | 9  |
| GR1120005 | SCI    | AISTHITIKO DASOS<br>NESTOU                                                                        | 1 | 1 | 1 | 1 | 0 | 0 | 0 | 0 | 0 | 0 | 2 | 0 | 0 | 0 | 1 | 0 | 0 | 1 | 0 | 8  |
| GR1140001 | SCI    | DASOS FRAKTOU                                                                                     | 1 | 1 | 0 | 0 | 0 | 0 | 0 | 0 | 0 | 0 | 1 | 0 | 0 | 0 | 1 | 3 | 0 | 1 | 0 | 8  |
| GR1330001 | SCI    | OROS VOYRINOS<br>(KORYFI<br>ASPROVOYNTI)                                                          | 1 | 1 | 1 | 0 | 0 | 0 | 0 | 0 | 0 | 0 | 1 | 0 | 0 | 0 | 1 | 0 | 1 | 2 | 0 | 8  |
