# Supplementary material
Source: publisher figshare collection journal article supplement (https://tandf.figshare.com/articles/dataset/_/6809906)
Supplement: Supplementary file 2 [file 1]

**Supplementary table S3:** List of stakeholders and their type of involvement in various studies and assessments. The outcomes of the consultation were used for expert elicitation.

| List of stakeholders                                                                                                                 | Type of involvement                                                                                                                                                                                                                                                                                                                           |
|--------------------------------------------------------------------------------------------------------------------------------------|-----------------------------------------------------------------------------------------------------------------------------------------------------------------------------------------------------------------------------------------------------------------------------------------------------------------------------------------------|
| Representative from the Ministry of Environment & Energy                                                                             | Consultation during: (a) the Natura 2000 monitoring and mapping, EU reporting projects; (b) the compilation of Special Environmental Studies for Protected areas with Management Bodies' in Greece (c) the compilation of the National Biodiversity Strategy; (d) the compilation of the Greek National Prioritized Action Framework (PAF-GR) |
| Representative from the Ministry of Rural Development and Food                                                                       | Consultation on agricultural, forest and fisheries products, during the compilation of Special Environmental Studies for Protected areas                                                                                                                                                                                                      |
| Protected areas' Management Bodies (from 14 out of 28)                                                                               | Consultation during the compilation of Special Environmental Studies for Protected areas                                                                                                                                                                                                                                                      |
| Forest Service                                                                                                                       | Consultation and data provision during the compilation of Special Environmental Studies for Protected areas                                                                                                                                                                                                                                   |
| Local administrative units (from all, 13, Regions of Greece): Municipalities, Chambers, Primary and secondary sector representatives | Consultation and data provision during the compilation of Special Environmental Studies for Protected areas                                                                                                                                                                                                                                   |
