# Supplementary material
Source: publisher figshare collection journal article supplement (https://tandf.figshare.com/articles/dataset/_/6809906)
Supplement: Supplementary file 3 [file 1]

Archive with 4 entries (4 files):
- TBSM_A_1415974_Table S1.pdf
- TBSM_A_1415974_Table S2.pdf
- TBSM_A_1415974_Table S3.pdf
- TBSM_A_1415974_Table S4.pdf
