# Supplementary material
Source: publisher figshare collection journal article supplement (https://tandf.figshare.com/articles/dataset/_/6809906)
Supplement: Supplementary file 3 [file 1 › TBSM_A_1415974_Table S1.pdf]

**Supplementary table S1.** Typology of the correspondence of the habitat types present in the study area to the MAES categories (Level 2) and Provisioning and Regulating and Maintenance ES scoring, accompanied by degree of confidence colors (Red = Very low, Orange = Low, Yellow = Medium, Light green = High, Green = Very high).

| ECOSYSTEM TYPE          | PRIORITY HABITAT | HABITAT NAME                                                                                                               | CODE | TOTAL AREA | PROVISIONING | REGULATING & MAINTENANCE |
|-------------------------|------------------|----------------------------------------------------------------------------------------------------------------------------|------|------------|--------------|--------------------------|
| Woodland and forest     |                  | Afforestation                                                                                                              | 1030 | 4304421    | 1            | 5                        |
| Woodland and forest     |                  | Afforestation with european species                                                                                        | 1031 | 94768002   | 1            | 3                        |
| Coastal                 | *                | Posidonia beds (Posidonion oceanicae)                                                                                      | 1120 | 9306       | 2            | 5                        |
| Sparsely vegetated land |                  | Annual vegetation of drift lines                                                                                           | 1210 | 278541     | 0            | 4                        |
| Sparsely vegetated land |                  | Vegetated sea cliffs of the Mediterranean coasts with endemic Limonium sp.                                                 | 1240 | 11594440   | 0            | 3                        |
| Sparsely vegetated land |                  | Embryonic shifting dunes                                                                                                   | 2110 | 1657984    | 0            | 5                        |
| Sparsely vegetated land |                  | Embryonic shifting dunes                                                                                                   | 2110 | 2024102    | 1            | 5                        |
| Sparsely vegetated land |                  | Shifting dunes along the shoreline with Ammophila arenaria                                                                 | 2120 | 7259776    | 0            | 5                        |
| Heathland and shrub     | *                | Coastal dunes with Juniperus spp.                                                                                          | 2250 | 1376167    | 1            | 5                        |
| Rivers and lakes        |                  | Natural eutrophic lakes with Magnopotamion or Hydrocharition — type vegetation                                             | 3150 | 7549808    | 2            | 5                        |
| Rivers and lakes        |                  | Alpine rivers and their ligneous vegetation with Salix elaeagnos                                                           | 3240 | 477290     | 3            | 4                        |
| Rivers and lakes        |                  | Constantly flowing Mediterranean rivers with Paspalo-Agrostidion species and hanging curtains of Salix and Populus alba    | 3280 | 9688828    | 5            | 1                        |
| Heathland and shrub     |                  | Alpine and Boreal heaths                                                                                                   | 4060 | 157084918  | 5            | 5                        |
| Heathland and shrub     |                  | Endemic oro-Mediterranean heaths with gorse                                                                                | 4090 | 1198077994 | 5            | 5                        |
| Heathland and shrub     |                  | Arborescent matorral with Juniperus spp.                                                                                   | 5210 | 197107227  | 4            | 3                        |
| Heathland and shrub     |                  | Sarcopoterium spinosum phryganas                                                                                           | 5420 | 856291296  | 4            | 4                        |
| Heathland and shrub     |                  | Endemic phryganas of the Euphorbio-Verbascion                                                                              | 5430 | 182162044  | 4            | 4                        |
| Grassland               |                  | Alpine and subalpine calcareous grasslands                                                                                 | 6170 | 330652002  | 5            | 4                        |
| Grassland               | *                | Species-rich Nardus grasslands, on siliceous substrates in mountain areas (and submountainous areas in Continental Europe) | 6230 | 141132462  | 5            | 5                        |
| Grassland               |                  | Mediterranean tall humid grasslands of the Molinio-Holoschoenion                                                           | 6420 | 5272795    | 4            | 3                        |
| Grassland               |                  | Hydrophilous tall herb fringe communities of plains and of the montane to alpine levels                                    | 6430 | 1713379    | 4            | 3                        |
| Grassland               |                  | Lowland hay meadows (Alopecurus pratensis, Sanguisorba officinalis)                                                        | 6510 | 860276     | 5            | 3                        |
| Wetlands                |                  | Alkaline fens                                                                                                              | 7230 | 1452472    | 1            | 4                        |
| Sparsely vegetated land |                  | Calcareous rocky slopes with chasmophytic vegetation                                                                       | 8210 | 139474735  | 1            | 4                        |
| Sparsely vegetated land |                  | Siliceous rocky slopes with chasmophytic vegetation                                                                        | 8220 | 23878790   | 1            | 4                        |
| Sparsely vegetated land |                  | Caves not open to the public                                                                                               | 8310 | 999        | 0            | 0                        |
| Woodland and forest     |                  | Luzulo-Fagetum beech forests                                                                                               | 9110 | 553238156  | 1            | 5                        |

|                     |   |                                                                                                            |      |            |   |   |
|---------------------|---|------------------------------------------------------------------------------------------------------------|------|------------|---|---|
| Woodland and forest |   | Asperulo-Fagetum beech forests                                                                             | 9130 | 474402616  | 1 | 5 |
| Woodland and forest |   | Medio-European subalpine beech woods with Acer and Rumex arifolius                                         | 9140 | 4768006    | 1 | 5 |
| Woodland and forest |   | Medio-European limestone beech forests of the Cephalanthero-Fagion                                         | 9150 | 84240598   | 1 | 5 |
| Woodland and forest | * | Tilio-Acerion forests of slopes, screes and ravines                                                        | 9180 | 2407563    | 1 | 5 |
| Woodland and forest |   | Quercus trojana woods                                                                                      | 9250 | 52757395   | 1 | 5 |
| Woodland and forest |   | Castanea sativa woods                                                                                      | 9260 | 113286166  | 4 | 5 |
| Woodland and forest |   | Hellenic beech forests with Abies borisii                                                                  | 9270 | 44270006   | 1 | 5 |
| Woodland and forest |   | Quercus frainetto woods                                                                                    | 9280 | 128124426  | 3 | 5 |
| Woodland and forest |   | Cupressus forests (Acero-Cupression)                                                                       | 9290 | 210473189  | 1 | 5 |
| Woodland and forest |   | Aegean Quercus brachyphylla woods                                                                          | 9310 | 811565     | 2 | 5 |
| Woodland and forest |   | Quercus ilex and Quercus rotundifolia                                                                      | 9340 | 462403861  | 2 | 5 |
| Woodland and forest |   | Quercus macrolepis forests                                                                                 | 9350 | 7405535    | 2 | 5 |
| Woodland and forest | * | Palm groves of Phoenix                                                                                     | 9370 | 30498      | 0 | 5 |
| Woodland and forest |   | Acidophilous Picea forests of the montane to alpine levels (Vaccinio-Piceetea)                             | 9410 | 28601307   | 1 | 5 |
| Woodland and forest | * | (Sub-) Mediterranean pine forests with endemic black pines                                                 | 9530 | 791570946  | 1 | 5 |
| Woodland and forest |   | Mediterranean pine forests with endemic Mesogean pines                                                     | 9540 | 810342005  | 2 | 5 |
| Woodland and forest | * | Endemic forests with Juniperus spp.                                                                        | 9560 | 66555826   | 3 | 5 |
| Woodland and forest |   | Mediterranean Taxus baccata woods                                                                          | 9580 | 1588725    | 1 | 5 |
| Grassland           |   | Eastern sub-Mediterranean dry grasslands (Scorzoneratalia villosae)                                        | 62A0 | 211160875  | 5 | 4 |
| Wetlands            |   | Greek reedbeds                                                                                             | 72A0 | 11682889   | 1 | 4 |
| Wetlands            |   | High sedge communities                                                                                     | 72B0 | 580196     | 1 | 1 |
| Woodland and forest |   | Rhodopide and Balkan Range Scots pine forests                                                              | 91CA | 104098457  | 1 | 5 |
| Woodland and forest |   | Pannonian-Balkan turkey oak –sessile oak forests                                                           | 91M0 | 1636618787 | 1 | 5 |
| Woodland and forest | * | Alluvial forests with Alnus glutinosa and Fraxinus excelsior (Alno-Padion, Alnion incanae, Salicion albae) | 91E0 | 4669762    | 1 | 5 |
| Woodland and forest |   | Ostrya, Carpinus and mixed thermophilous forests                                                           | 925A | 321246197  | 1 | 5 |
| Woodland and forest |   | Salix alba and Populus alba galleries                                                                      | 92A0 | 14263306   | 1 | 5 |
| Woodland and forest |   | Platanus orientalis and Liquidambar orientalis woods (Platanion orientalis)                                | 92C0 | 84933590   | 1 | 5 |
| Woodland and forest |   | Southern riparian galleries and thickets (Nerio-Tamaricetea and Securinegion tinctoriae)                   | 92D0 | 6549522    | 2 | 5 |
| Woodland and forest |   | Quercus coccifera forests                                                                                  | 934A | 585072111  | 2 | 5 |
| Woodland and forest |   | Greek fir forests (Abies cephalonica)                                                                      | 951B | 1085408021 | 1 | 5 |
| Woodland and forest |   | High oro-Mediterranean pine forests                                                                        | 95A0 | 103346656  | 2 | 5 |
| Woodland and forest |   | Greek forests of Betula pendula                                                                            | G91K | 24804008   | 1 | 5 |
| Woodland and forest |   | Supra-Mediterranean stands of Populus tremula                                                              | G91L | 66908      | 1 | 5 |
| Cropland            |   | Arable land                                                                                                | 1020 | 1418282189 | 5 | 2 |

|                                       |   |                                                                                                                              |      |           |   |   |
|---------------------------------------|---|------------------------------------------------------------------------------------------------------------------------------|------|-----------|---|---|
| Cropland                              |   | Abandoned arable land                                                                                                        | 1021 | 124474321 | 4 | 3 |
| Urban (Settlements)                   |   |                                                                                                                              | 1050 | 81143919  | 2 | 0 |
| Sparsely vegetated land               |   | Sandy substrate without vegetation                                                                                           | 1061 | 199776    | 0 | 1 |
| Marine inlets and transitional waters |   | Estuaries                                                                                                                    | 1130 | 11959     | 1 | 4 |
| Sparsely vegetated land               |   | Salicornia and other annuals colonizing mud and sand                                                                         | 1310 | 12691     | 1 | 3 |
| Wetlands                              |   | Mediterranean salt meadows ( <i>Juncetalia maritimi</i> )                                                                    | 1410 | 1123310   | 3 | 3 |
| Wetlands                              |   | Mediterranean and thermo-Atlantic halophilous scrubs ( <i>Sarcocornetea fruticosi</i> )                                      | 1420 | 68349     | 3 | 3 |
| Heathland and shrub                   |   | Cisto-Lavenduletales dune sclerophyllous scrubs                                                                              | 2260 | 10659     | 1 | 5 |
| Wetlands                              |   | Oligotrophic to mesotrophic standing waters with vegetation of the Littorelletea uniflorae and/or of the Isoëto-Nanojuncetea | 3130 | 9365944   | 3 | 2 |
| Wetlands                              | * | Mediterranean temporary ponds                                                                                                | 3170 | 246619    | 3 | 1 |
| Rivers and lakes                      |   | Water body without vegetation                                                                                                | 3190 | 127474557 | 4 | 3 |
| Rivers and lakes                      |   | Water courses of plain to montane levels with the Ranunculion fluitantis and Callitriche-Batrachion vegetation               | 3260 | 86032     | 3 | 5 |
| Rivers and lakes                      |   | Intermittently flowing Mediterranean rivers of the Paspalo-Agrostidion                                                       | 3290 | 8834807   | 2 | 1 |
| Heathland and shrub                   |   | Stable xerothermophilous formations with <i>Buxus sempervirens</i> on rock slopes ( <i>Berberidion</i> p.p.)                 | 5110 | 4581197   | 1 | 1 |
| Heathland and shrub                   |   | <i>Pteridium aquilinum</i> stands                                                                                            | 5150 | 88473526  | 1 | 2 |
| Heathland and shrub                   |   | Thermo-Mediterranean and pre-desert scrub                                                                                    | 5330 | 709186    | 3 | 4 |
| Heathland and shrub                   |   | Garrigues of Eastern Mediterranean                                                                                           | 5340 | 287786557 | 4 | 3 |
| Heathland and shrub                   |   | <i>Pseudomaquis</i>                                                                                                          | 5350 | 522277714 | 3 | 3 |
| Grassland                             | * | Pseudo-steppe with grasses and annuals of the Thero-Brachypodietea                                                           | 6220 | 118034347 | 5 | 5 |
| Sparsely vegetated land               |   | Eastern Mediterranean screes                                                                                                 | 8140 | 111247169 | 1 | 3 |
| Sparsely vegetated land               |   | Unvegetated bedrock                                                                                                          | 8250 | 29307374  |   | 2 |
| Sparsely vegetated land               |   | Adiantetalia: <i>Acrocladio-Adiantetum</i> σε σχιστόλιθο                                                                     | 8260 | 4590      | 1 | 3 |
| Sparsely vegetated land               |   | Unvegetated riverbed                                                                                                         | 9620 | 3674422   | 2 | 3 |
| Sparsely vegetated land               |   | Unvegetated sandy beaches                                                                                                    | 21B0 | 841223    | 1 | 2 |
| Sparsely vegetated land               |   | Ετήσιες κοινότητες σε υλώδεις όχθες ποταμών της Ευρο-Σιβηρικής                                                               | 32B0 | 8         | 2 | 3 |
| Grassland                             |   | Mesophilous pastures                                                                                                         | 651A | 9523175   | 4 | 3 |
