# Supplementary material
Source: publisher figshare collection journal article supplement (https://tandf.figshare.com/articles/dataset/_/6809906)
Supplement: Supplementary file 3 [file 1 › TBSM_A_1415974_Table S4.pdf]

**Supplementary table S4:** Data quality evaluation, rating method and certainty designation for habitat level assessment based on the Natura 2000 field protocols attributes.

| Data type            | Quantitative                                                                      | Qualitative                                                                       | Spatial referenced                                                                 | Direct correspondence with ES                                                       | Confidence to data source                                                           | Additional comment                                                                                                                                                  |
|----------------------|-----------------------------------------------------------------------------------|-----------------------------------------------------------------------------------|------------------------------------------------------------------------------------|-------------------------------------------------------------------------------------|-------------------------------------------------------------------------------------|---------------------------------------------------------------------------------------------------------------------------------------------------------------------|
| Area                 | 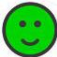 | 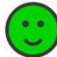 | 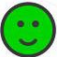 | 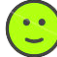 | 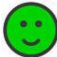 | Good quality data for services based on area extent (e.g. provisioning of cultivated products, biodiversity maintenance)                                            |
| Habitat type quality | N/A                                                                               | 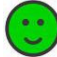 | 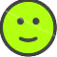 | 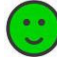 | 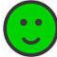 | Good quality data for services based on habitat condition (e.g. provisioning of, biodiversity maintenance, climate regulation, water purification, aesthetic value) |
| Abiotic features     | 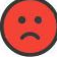 | 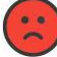 | 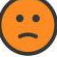 | 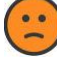 | 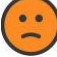 | -                                                                                                                                                                   |
| Biodiversity         | 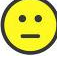 | 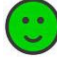 | 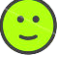 | 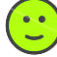 | 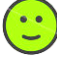 | -                                                                                                                                                                   |
| Ecosystem functions  | 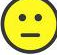 | 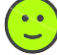 | 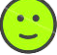 | 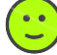 | 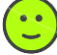 | -                                                                                                                                                                   |
| Bio-physical (other) | 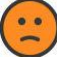 | 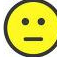 | 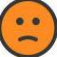 | 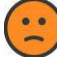 | 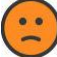 | -                                                                                                                                                                   |
| Social-economic      | 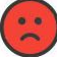 | 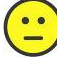 | 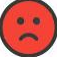 | 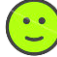 | 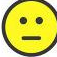 | Only site-level information                                                                                                                                         |

**Certainty designation:**

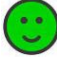 *Very high*
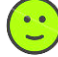 *High*
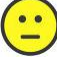 *Medium*
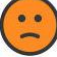 *Low*
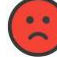 *Very low*
